# Supplementary material for: Pyridine-functionalized fullerene additive enabling coordination interactions with CH3NH3PbI3 perovskite towards highly efficient bulk heterojunction solar cells
Source: Royal Society of Chemistry journal article supplement (doi:10.1039/c8ta12206g), 2019-01-01
Supplement: c8ta12206g1.pdf [file c8ta12206g1.pdf]

Electronic Supplemental Information for

**Pyridine-functionalized Fullerene Additive Enabling Coordination  
Interactions with CH<sub>3</sub>NH<sub>3</sub>PbI<sub>3</sub> Perovskite towards Highly Efficient  
Bulk Heterojunction Solar Cells**

Jieming Zhen<sup>#a</sup>, Weiran Zhou<sup>#a</sup>, Muqing Chen<sup>\*#a</sup>, Bairu Li<sup>a</sup>, Lingbo Jia<sup>a</sup>, Mingtai Wang<sup>b</sup>, and Shangfeng Yang<sup>\*a</sup>

<sup>a</sup> Hefei National Laboratory for Physical Sciences at Microscale, CAS Key Laboratory of Materials for Energy Conversion, Department of Materials Science and Engineering, Synergetic Innovation Center of Quantum Information & Quantum Physics, University of Science and Technology of China, Hefei 230026, China.

E-mail: [mqchen@ustc.edu.cn](mailto:mqchen@ustc.edu.cn) (M. C.); [sfyang@ustc.edu.cn](mailto:sfyang@ustc.edu.cn) (S.Y.)

<sup>b</sup> Institute of Applied Technology, Hefei Institutes of Physical Science, Chinese Academy of Sciences, Hefei 230088, China

<sup>#</sup> These authors contributed equally to this work.

## **Contents**

- S1.  $^1\text{H}$  NMR and  $^{13}\text{C}$  NMR spectrum of  $\text{C}_{60}\text{-PyP}$ .**
- S2. Mass spectrum of  $\text{C}_{60}\text{-PyP}$ .**
- S3. Estimation of the energy levels of  $\text{C}_{60}\text{-PyP}$ .**
- S4. TGA analysis of  $\text{C}_{60}\text{-PyP}$ .**
- S5. UV-vis spectra of the  $\text{MAPbI}_3$  perovskite with varying  $\text{C}_{60}\text{-PyP}$  concentration.**
- S6. PCE histograms of the control and 0.13 wt% devices.**
- S7. Photovoltaic parameters box plots of devices with varying  $\text{C}_{60}\text{-PyP}$  concentration.**
- S8. Hysteresis characterization of devices with and without 0.13 wt%  $\text{C}_{60}\text{-PyP}$ .**
- S9. Histograms of grain size distributions of the  $\text{MAPbI}_3$  perovskite film with varying  $\text{C}_{60}\text{-PyP}$  concentration.**
- S10. XPS profile of I 3d of the  $\text{CH}_3\text{NH}_3\text{PbI}_3$  perovskite films without and with 1.0 wt%  $\text{C}_{60}\text{-PyP}$  doping**
- S11. Analysis of time-resolved photoluminescence (TRPL) spectra of the perovskite films with or without  $\text{C}_{60}\text{-PyP}$ .**
- S12. Fitted EIS data for Control and 0.13 wt% devices.**
- S13. J-V curves and the stabilized photocurrent densities and power outputs measured at the maximum power.**
- S14. Ambient stabilities of the control and  $\text{C}_{60}\text{-PyP}$  doped perovskite films.**

Figure 1 displays the  $^1\text{H}$  NMR spectrum of compound **1** in  $\text{CDCl}_3$ . The spectrum shows peaks corresponding to the aromatic protons of the naphthalene core (labeled a, b, c, d, e, f) and the 4-chlorophenyl group. The chemical structure of compound **1** is shown in the inset, with protons labeled a through f. The spectrum includes integration values for each peak, indicating the relative number of protons. The peaks are assigned as follows: aromatic protons (a, b, c, d, e, f) in the aromatic region (7.2-8.6 ppm), the  $\text{CDCl}_3$  solvent peak at 7.26 ppm, and the 4-chlorophenyl protons (a, b) at 2.29 and 2.00 ppm. The naphthalene core protons are visible in the 5.4-5.5 ppm range.

S3

## S2. Mass spectrum of C<sub>60</sub>-PyP.

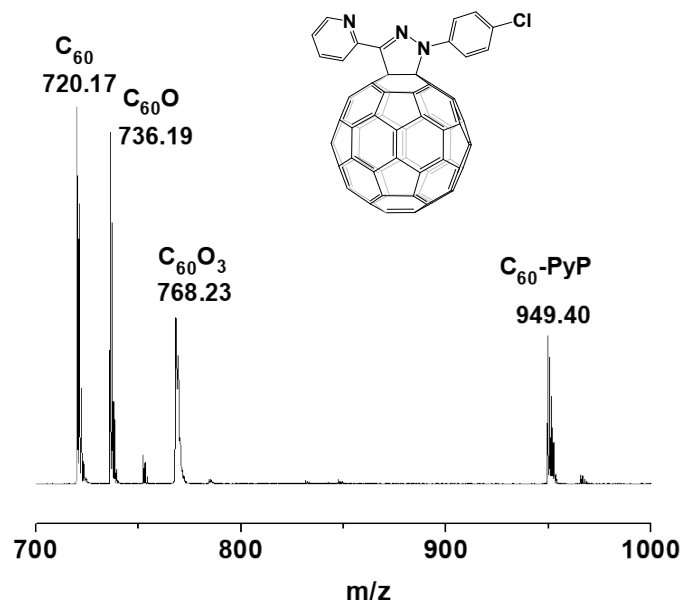

**Figure S3.** MALDI-TOF Mass spectra of C<sub>60</sub>-PyP.

## S3. Estimation of the energy levels of C<sub>60</sub>-PyP.

**Table S1.** Electrochemical data of C<sub>60</sub>-PyP and PCBM.

|                      | $\lambda_{\text{onset}}^{\text{a}}$<br>(nm) | $E_{\text{g,opt}}^{\text{b}}$<br>(eV) | $E_{\text{red,onset}}^{\text{c}}$<br>(eV) | $E_{\text{LUMO}}^{\text{d}}$<br>(eV) | $E_{\text{HOMO}}^{\text{e}}$<br>(eV) |
|----------------------|---------------------------------------------|---------------------------------------|-------------------------------------------|--------------------------------------|--------------------------------------|
| C <sub>60</sub> -PyP | 723                                         | 1.72                                  | -0.94                                     | -3.89                                | -5.61                                |
| C <sub>60</sub> -MPy | 724                                         | 1.71                                  | -1.00                                     | -3.80                                | -5.51                                |
| C <sub>60</sub> -Bpy | 724                                         | 1.71                                  | -0.99                                     | -3.81                                | -5.52                                |
| C <sub>60</sub> -HPy | 724                                         | 1.71                                  | -0.97                                     | -3.83                                | -5.54                                |
| PCBM                 | 725                                         | 1.71                                  | -0.98                                     | -3.82                                | -5.53                                |

<sup>a</sup> Attained from UV-vis spectrum; <sup>b</sup>  $E_{\text{g,opt}} = 1240/\lambda_{\text{onset}}$ ; <sup>c</sup> Referred to the half wave potential of ferrocene; <sup>d</sup>  $E_{\text{LUMO}} = -e(E_{\text{red,onset}} + 4.8 \text{ V})$ ; <sup>e</sup>  $E_{\text{HOMO}} = E_{\text{LUMO}} - E_{\text{g,opt}}$

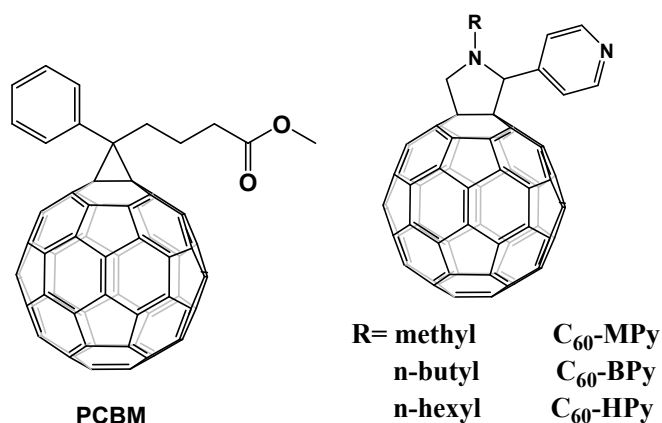

The structure of PCBM and C<sub>60</sub>-Py.

The energy levels of the lowest unoccupied molecular orbital (LUMO) and highest occupied molecular orbital (HOMO) of the fullerene derivatives were estimated by a cyclic voltammetry study in combination with UV-Vis absorption spectroscopy. Cyclic voltammetry study was performed in *o*-dichlorobenzene with a CHI 630D potentiostat (CHI Instrument, U.S.A.) at room temperature. The supporting electrolyte was tetrabutylammonium perchlorate (TBPA, electrochemical grade, Fluka). A standard three-electrode arrangement of a platinum (Pt) wire as counter electrode, a platinum coil as working electrode, and a saturated calomel electrode as a pseudo-reference electrode was used. In a comparison experiment, ferrocene (Fc) was added as the internal standard and all potentials are referred to the Fc<sup>+</sup>/Fc couple.

The onset reduction potentials ( $E_{\text{red, onset}}$ ) of C<sub>60</sub>-PyP, C<sub>60</sub>-BPy was estimated to be -0.94 V vs Fc<sup>+</sup>/Fc. Thus, the LUMO energy levels of C<sub>60</sub>-PyP was calculated by  $E_{\text{LUMO}} = -e(E_{\text{red, onset}} + 4.8)$ . The HOMO energy level of C<sub>60</sub>-PyP was calculated by  $E_{\text{HOMO}} = E_{\text{g, opt}} - E_{\text{LUMO}}$ ,<sup>1</sup> where  $E_{\text{g, opt}}$  is the optical bandgap. Based on the onset ( $\lambda_{\text{onset}}$ ) of UV-vis absorption spectrum of C<sub>60</sub>-PyP (~723 nm, see Fig. 2b),  $E_{\text{g, opt}}$  is estimated to be ~ 1.72 eV, according to the equation:  $E_{\text{g, opt}} = 1240/\lambda_{\text{onset}}$ .<sup>2</sup> Therefore, the HOMO energy levels of C<sub>60</sub>-PyP was estimated to be -5.61 eV. The data of PCBM and C<sub>60</sub>-Py are quoted from Ref. S2.

#### S4. TGA analysis of C<sub>60</sub>-PyP.

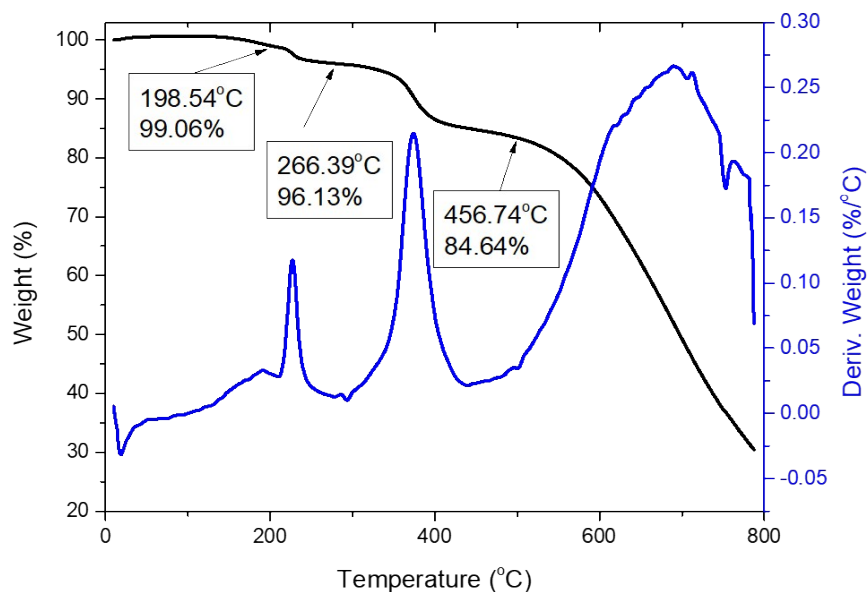

**Figure S4.** TGA curve (solid line) and differential thermo-gravimetric (DTG) curve (dashed line) of C<sub>60</sub>-PyP.

#### S5. UV-vis spectra of the MAPbI<sub>3</sub> perovskite with varying C<sub>60</sub>-PyP concentration.

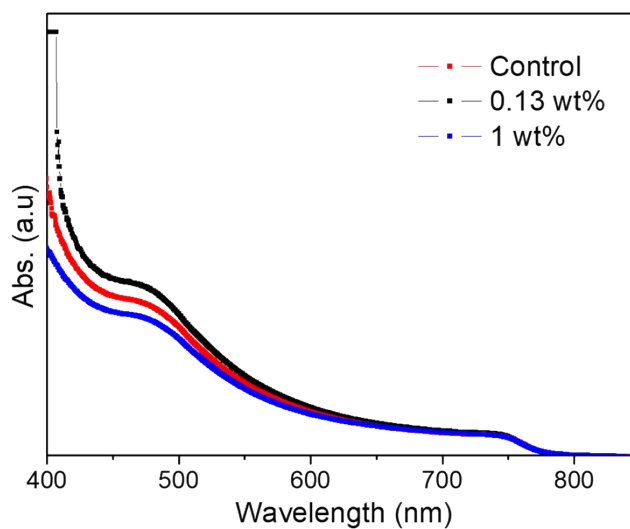

**Figure S5.** UV-vis spectra of the MAPbI<sub>3</sub> perovskite with varying C<sub>60</sub>-PyP concentration.

#### S6. PCE histograms of the control and 0.13 wt% devices.

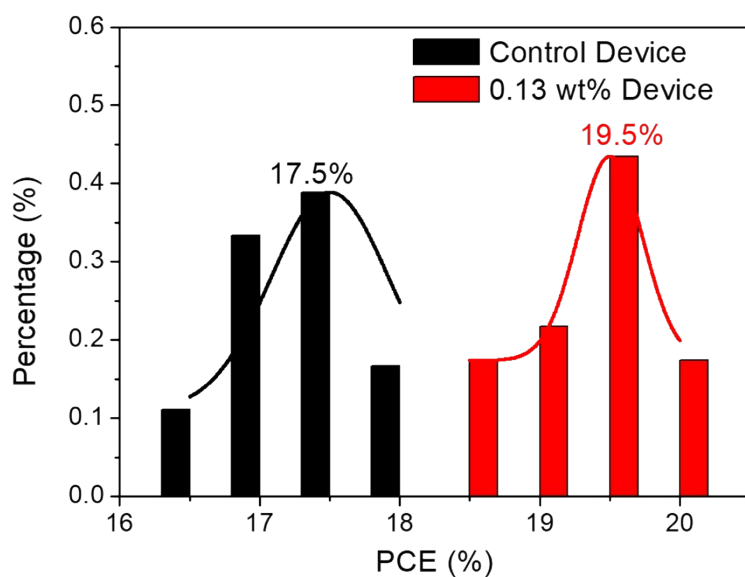

**Figure S6.** PCE histograms of the control and 0.13 wt% devices.

**S7. Photovoltaic parameters box plots of devices with varying C<sub>60</sub>-PyP concentration.**

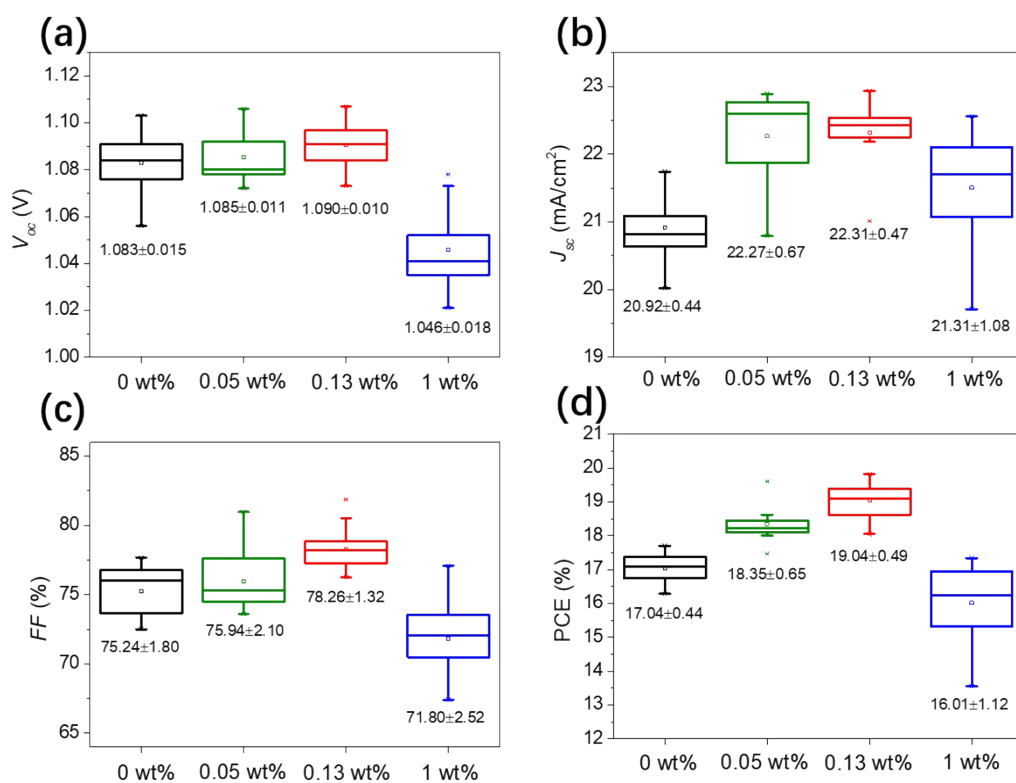

**Figure S7.** Box plots of  $V_{oc}$  (a),  $J_{sc}$  (b),  $FF$  (c) and PCE (d) for PSC devices with varying C<sub>60</sub>-PyP concentration.

**S8. Hysteresis characterization of devices with and without 0.13 wt% C<sub>60</sub>-PyP.**

**Table S2.** Photovoltaic parameters of the devices in different scan directions with 0.1 V/s scan rate.

| Device   | Scan direction | $V_{oc}$ (V) | $J_{sc}$ (mA/cm <sup>2</sup> ) | $FF$ (%) | PCE (%) | Hysteresis Factor <sup>a</sup> (%) |
|----------|----------------|--------------|--------------------------------|----------|---------|------------------------------------|
| 0%       | reverse        | 1.082        | 21.01                          | 73.65    | 16.74   | 20.3%                              |
|          | forward        | 1.038        | 19.87                          | 64.67    | 13.35   |                                    |
| 0.13 wt% | reverse        | 1.092        | 22.25                          | 77.26    | 18.77   | 0.53%                              |
|          | forward        | 1.088        | 22.46                          | 76.44    | 18.67   |                                    |

<sup>a</sup> Hysteresis Factor = [PCE (reverse) – PCE (forward)]/PCE (reverse)

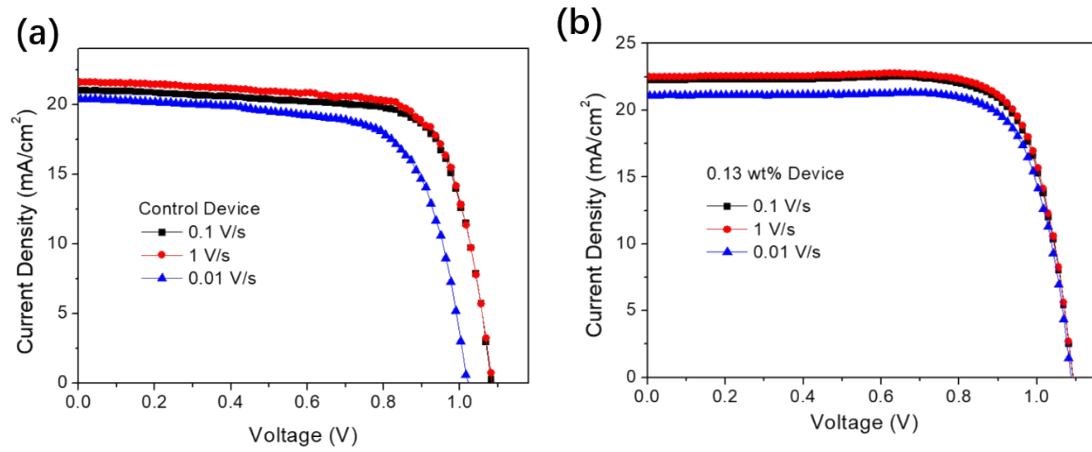

**Figure S8.** J-V curves of the control (a) and 0.13 wt% (b) devices with different scan rates. The measurements were carried out under illumination of an AM 1.5 solar simulator (100 mW•cm<sup>-2</sup>) in air.

**Table S3.** Photovoltaic parameters of the control and 0.13 wt% PSC devices with different scan rates.

| Device   | Scan Rate | $V_{oc}$ (V) | $J_{sc}$ (mA/cm <sup>2</sup> ) | $FF$ (%) | PCE (%) | $R_s$ ( $\Omega$ •cm <sup>2</sup> ) | $R_{sh}$ ( $\Omega$ •cm <sup>2</sup> ) |
|----------|-----------|--------------|--------------------------------|----------|---------|-------------------------------------|----------------------------------------|
| Control  | 0.01V/s   | 1.031        | 20.40                          | 70.20    | 14.77   | 13.43                               | 1556.63                                |
|          | 0.1V/s    | 1.082        | 21.01                          | 73.65    | 16.74   | 5.06                                | 1170.35                                |
|          | 1V/s      | 1.084        | 21.60                          | 72.50    | 16.98   | 5.43                                | 1208.30                                |
| 0.13 wt% | 0.01V/s   | 1.087        | 21.10                          | 77.65    | 17.81   | 4.68                                | 7201.70                                |
|          | 0.1V/s    | 1.092        | 22.25                          | 77.26    | 18.77   | 4.41                                | 3584.64                                |
|          | 1V/s      | 1.093        | 22.50                          | 77.50    | 19.05   | 4.46                                | 3991.21                                |

## S9. Histograms of grain size distributions of the MAPbI<sub>3</sub> perovskite film with varying C<sub>60</sub>-PyP concentration.

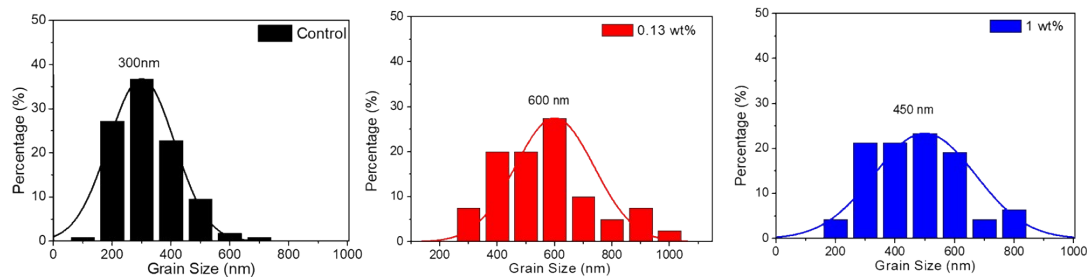

**Figure S9.** Histograms of grain size distributions of the MAPbI<sub>3</sub> perovskite film with varying C<sub>60</sub>-PyP concentration.

**S10. XPS profile of I 3d of the CH<sub>3</sub>NH<sub>3</sub>PbI<sub>3</sub> perovskite films without and with 1.0 wt% C<sub>60</sub>-PyP doping.**

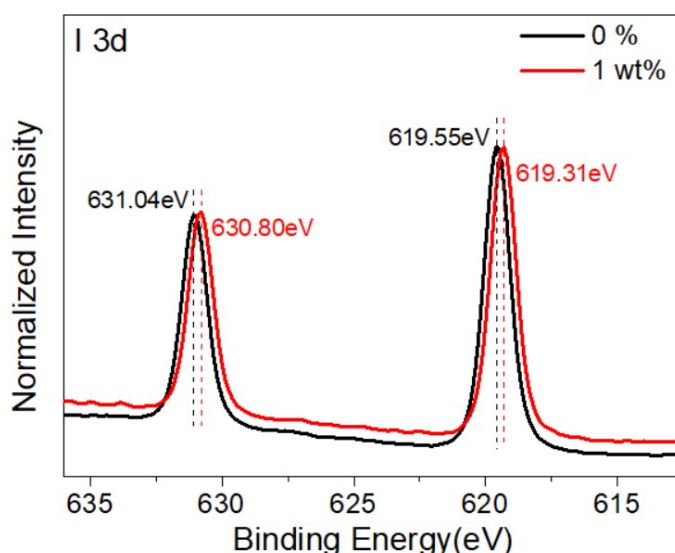

**Figure S10.** I 3d XPS spectra of the CH<sub>3</sub>NH<sub>3</sub>PbI<sub>3</sub> perovskite films without and with 1.0 wt% C<sub>60</sub>-PyP doping.

**S11. Analysis of time-resolved photoluminescence (TRPL) spectra of the perovskite films with or without C<sub>60</sub>-PyP.**

The excitation source was a 543 nm picosecond laser pulse which was filtered from a super continuum generation. The TRPL spectrum can be fitted by a single-exponential decay function as shown in equation (S1):<sup>[3-5]</sup>

$$f(t) = A \cdot \exp\left(\frac{-t}{\tau}\right) + B \quad (\text{S1})$$

Where A,  $\tau$  and B are the decay amplitude, the decay lifetime, and a constant for the baseline offset, respectively. The pristine MAPbI<sub>3</sub> perovskite film shows a lifetime of

$\tau = 39.41$  ns, which is similar to those reported values for perovskite film fabricated under similar conditions. After the addition of C<sub>60</sub>-PyP, the  $\tau$  value dramatically increases to 8.82.

#### **S12. Fitted EIS data for Control and 0.13 wt% devices.**

From the Nyquist plot (Figure 5f), the impedance spectra were fitted with one R-CPE arcs, which a resistor  $R_s$  (series resistance) and parallel with an R-CPE elements.  $R_s$  is determined by the starting point at the real part of the Nyquist plot. The  $R_{ct}$  (charge transfer resistance) is related to the charge transfer dynamics of devices, CPE is the non-ideal chemical capacitances.

**Table S4.** Fitted EIS data for Control and 0.13 wt% devices.

| Device  | $R_s$ ( $\Omega \cdot \text{cm}^2$ ) | $R_{ct}$ ( $\Omega \cdot \text{cm}^2$ ) | CPE-T (F/cm <sup>2</sup> ) | CPE-P |
|---------|--------------------------------------|-----------------------------------------|----------------------------|-------|
| Control | 2.802                                | 32.45                                   | 3.12E-07                   | 0.993 |
| 0.13wt% | 1.385                                | 23.71                                   | 3.24E-07                   | 0.989 |

#### **S13. J-V curves and the stabilized photocurrent densities and power outputs measured at the maximum power.**

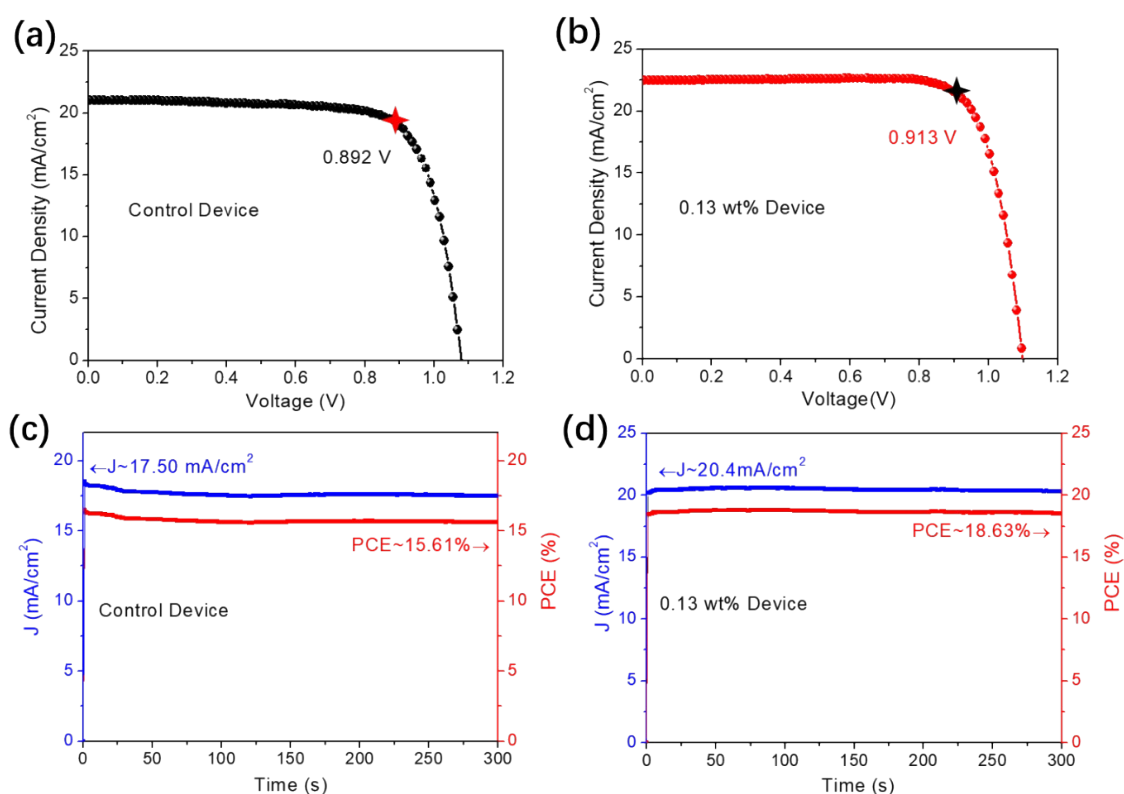

**Figure S11.** J-V curves (a-b) and the stabilized photocurrent densities and power outputs (c-d) measured at the maximum power points (labelled in curves a-b) of the control and 0.13 wt% devices. For J-V curve measurements, the scanning direction is from open-circuit voltage to short circuit (reverse) and the measurements were carried out with 0.1 V/s scan rate.

**Table S5.** Photovoltaic parameters of the Control and 0.13 wt% devices

| Device   | V <sub>oc</sub> (V) | J <sub>sc</sub> (mA/cm <sup>2</sup> ) | FF (%) | PCE (%) | Maximum power point (V) | Stabilized J (mA/cm <sup>2</sup> ) | Stabilized PCE (%) |
|----------|---------------------|---------------------------------------|--------|---------|-------------------------|------------------------------------|--------------------|
| Control  | 1.079               | 21.03                                 | 75.14  | 17.05   | 0.892                   | 17.50                              | 15.61              |
| 0.13 wt% | 1.098               | 22.47                                 | 78.84  | 19.45   | 0.913                   | 20.40                              | 18.63              |

#### S14. Ambient stabilities of the control and C<sub>60</sub>-PyP doped perovskite films.

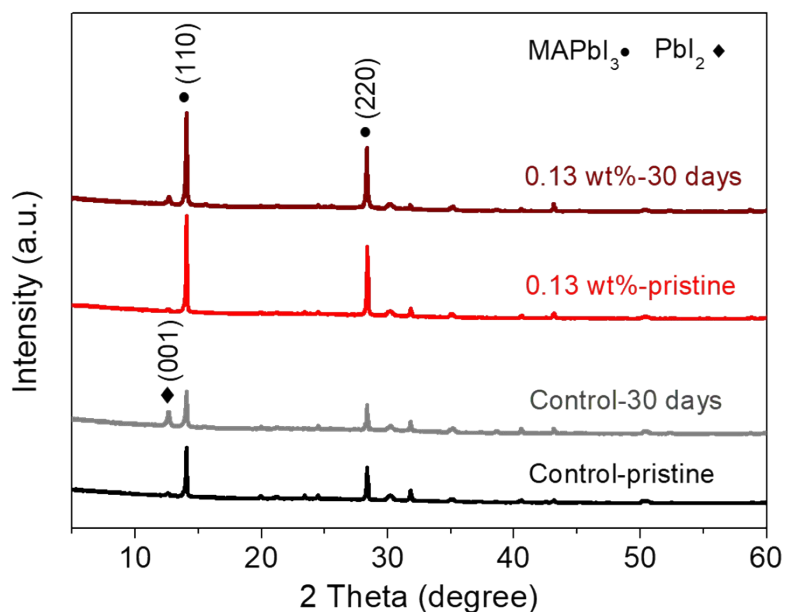

**Figure S12.** XRD patterns of the control and 0.13 wt% perovskite films before and after ambient storage for 30 days.

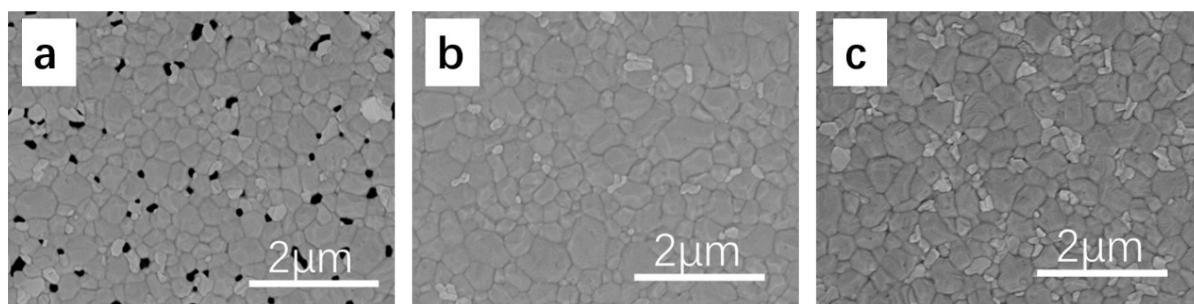

**Figure S13.** Surface topographic SEM of the MAPbI<sub>3</sub> perovskite film with varying C<sub>60</sub>-Pyridine concentration after storage for 24h at 80% humidity. (a) Pristine film without C<sub>60</sub>-PyP, (b) with 0.13 wt% C<sub>60</sub>-PyP, and (c) with 1 wt% C<sub>60</sub>-PyP.

#### Reference:

- (1) H. Wang, W. Zhang, C. Xu, X. Bi, B. Chen and S. Yang, *ACS Appl. Mater. Inter.*, 2013, **5**, 26-34.
- (2) B. Li, J. Zhen, Y. Wan, X. Lei, Q. Liu, Y. Liu, L. Jia, X. Wu, H. Zeng, W. Zhang, G. W. Wang, M. Chen and S. Yang, *ACS Appl. Mater Interfaces*, 2018, **10**, 32471-32482.
- (3) Y. Lin, L. Shen, J. Dai, Y. Deng, Y. Wu, Y. Bai, X. Zheng, J. Wang, Y. Fang, H. Wei, W. Ma, X. C. Zeng, X. Zhan and J. Huang, *Adv. Mater.*, 2017, **29**, 1604545.

- (4) J. W. Jung, C.-C. Chueh and A. K.-Y. Jen, *Adv. Energy Mater.*, 2015, **5**, 1500486.
- (5) P.-W. Liang, C.-Y. Liao, C.-C. Chueh, F. Zuo, S. T. Williams, X.-K. Xin, J. Lin and A. K.-Y. Jen, *Adv. Mater.*, 2014, **26**, 3748-3754.
